# Supplementary material for: Direct chemical synthesis of L10-FePtAu nanoparticles with high coercivity
Source: Royal Society of Chemistry journal article supplement (doi:10.1039/c4nr02345e), 2014-01-01
Supplement: c4nr02345e1.pdf [file c4nr02345e1.pdf]

## Electronic Supplementary Information

### Direct Chemical Synthesis of L1<sub>0</sub>-FePtAu Nanoparticles with High Coercivity

Yongsheng Yu,<sup>a,b\*</sup> P. Mukherjee,<sup>a</sup> Yuan Tian,<sup>c</sup> X.-Z. Li,<sup>a</sup> J. E. Shield<sup>c</sup> and D. J. Sellmyer<sup>a</sup> \*

<sup>a</sup>Nebraska Center for Materials and Nanoscience & Department of Physics and Astronomy, University of Nebraska-Lincoln, Lincoln, NE 68588, USA

<sup>b</sup>School of Materials Science and Engineering, Jilin University, Changchun 130025, China

<sup>c</sup>Mechanical and Materials Engineering & Nebraska Center for Materials and Nanoscience, University of Nebraska-Lincoln, Lincoln, Nebraska 68588, USA

\*To whom correspondence should be addressed. Email: [Yongshengyu80@gmail.com](mailto:Yongshengyu80@gmail.com),  
[dsellmyer@unl.edu](mailto:dsellmyer@unl.edu)

#### This file includes:

Figure S1 to S3

#### Figures

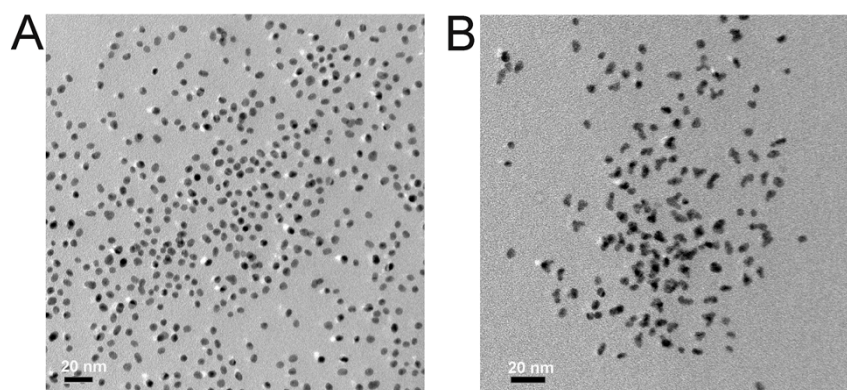

**Figure S1.** TEM images of (A) Fe<sub>37</sub>Pt<sub>63</sub> and (B) Fe<sub>58</sub>Pt<sub>42</sub> NPs.

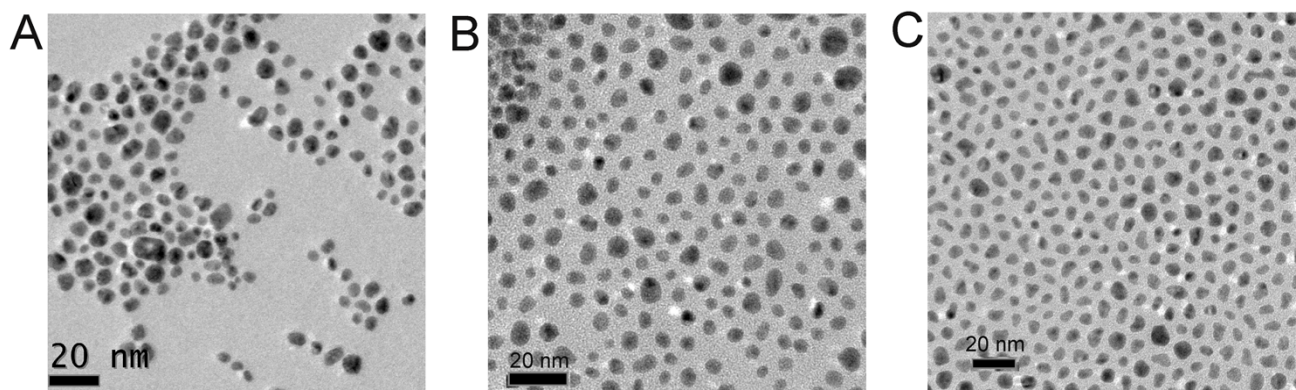

**Figure S2.** TEM images of (A)  $\text{Fe}_{43}\text{Pt}_{43}\text{Au}_{14}$ , (B)  $\text{Fe}_{41.5}\text{Pt}_{41.5}\text{Au}_{17}$  and (C)  $\text{Fe}_{40}\text{Pt}_{40}\text{Au}_{20}$  NPs.

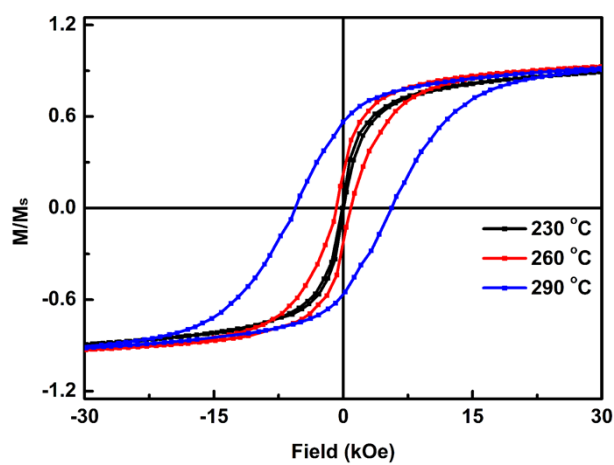

**Figure S3.** Hysteresis loops of the NPs synthesized at different temperatures.
